# Supplementary material
Source: MDPI journal article supplement (https://www.mdpi.com/2076-3417/10/1/25)

# Supporting Information

## Behaviors of Cellulose-Based Activated Carbon Fiber for Acetaldehyde Adsorption at Low Concentration

**Figure S1.** Comparison of  $\text{CH}_3\text{CHO}$  adsorption performances over a. different commercial adsorbent materials such as MSP-20, K-C, and quartz wool (QW), as well as b. the calcined CACFs at various temperatures.

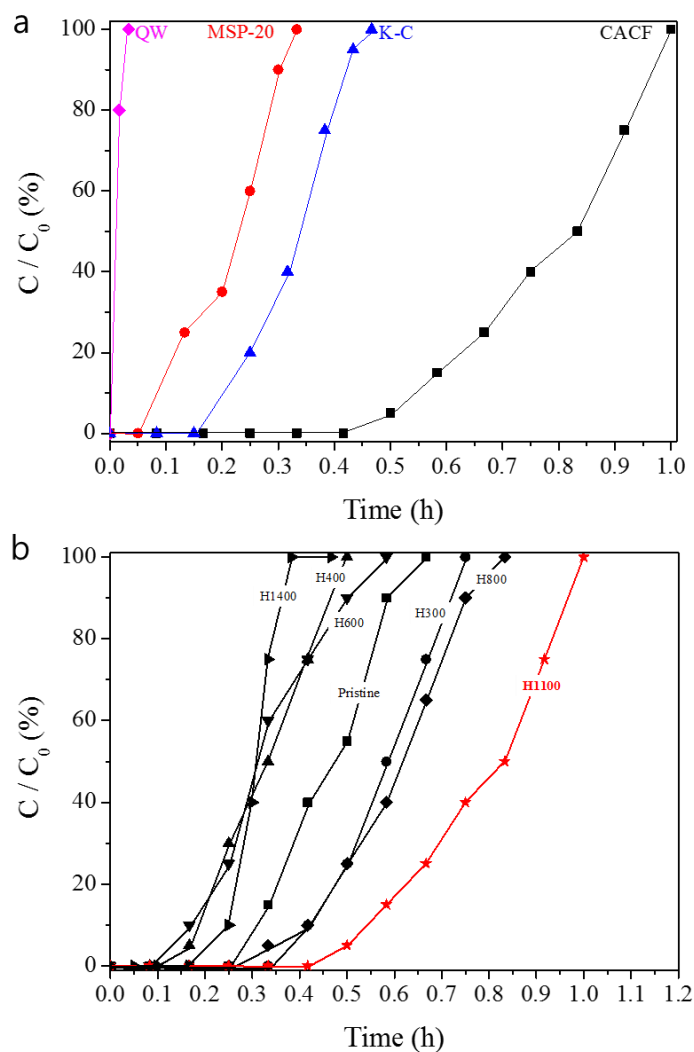

Supplement: s1 [file s1]
